# Supplementary material for: Crystallization kinetics of the phase change material GeSb6Te measured with dynamic transmission electron microscopy
Source: Royal Society of Chemistry journal article supplement (doi:10.1039/c6dt00298f), 2016-01-01
Supplement: c6dt00298f1.pdf [file c6dt00298f1.pdf]

Electronic Supplementary Information to

**Crystallization kinetics of the phase change materials GeSb<sub>6</sub>Te measured with dynamic transmission electron microscopy**

by M. M. Winseck, H.-Y. Cheng, G. H. Campbell, and M. K. Santala

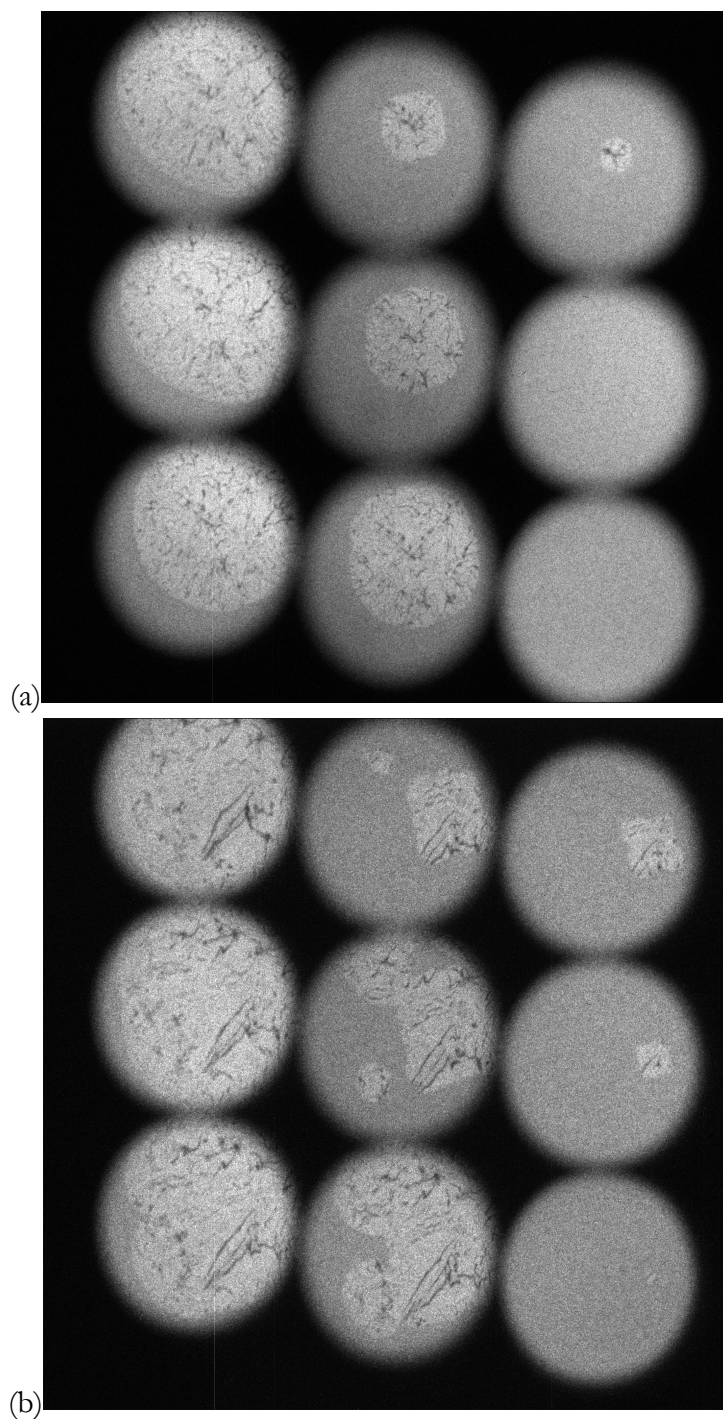

**Figure S1 a-b** The unprocessed images from which Figure 1 a-b of the main text was derived.
